# Supplementary material for: MOZ Regulates the Tbx1 Locus, and Moz Mutation Partially Phenocopies DiGeorge Syndrome
Source: PubMed Central journal article supplement — Dev Cell. 2012 Sep 11;23(3):652–63. doi: 10.1016/j.devcel.2012.07.010 (PMC3442180; doi:10.1016/j.devcel.2012.07.010), 2012-09-11
Supplement: mmc1.pdf [file mmc1.pdf]

Developmental Cell, Volume 23

## Supplemental Information

### MOZ Regulates the *Tbx1* Locus, and *Moz* Mutation Partially Phenocopies

### DiGeorge Syndrome

Anne K. Voss, Hannah K. Vanyai, Caitlin Collin, Mathew P. Dixon, Tamara S. McLennan, Bilal N. Sheikh, Peter Scambler, and Tim Thomas

## Inventory of Supplemental Information

### Supplemental data

**Figure S1, related to Figure 1:** Craniofacial, palate, aortic arch and cardiac abnormalities in *Moz* mutant neonates and embryos.

**Figure S2, related to Figure 3:** Expression of *T-box* genes in *Moz*<sup>Δ/Δ</sup> embryos.

**Figure S3, related to Figure 6:** Rescue of the *Moz*<sup>Δ/Δ</sup> mutant cardiac septal defect by a *Tbx1* transgene – serial images of *Moz*<sup>Δ/Δ</sup> mutant and *Tbx1* transgenic *Moz*<sup>Δ/Δ</sup> mutant hearts.

### Supplemental Experimental Procedures

**Table, related to Experimental Procedures:** cDNA templates for cDNA and cRNA probes.

**Table, related to Experimental Procedures:** Primers used for RT-qPCR experiments.

**Table, related to Experimental Procedures:** Primers used for qPCR in ChIP experiments

### Supplemental References

## Supplemental data

Voss\_Fig S1

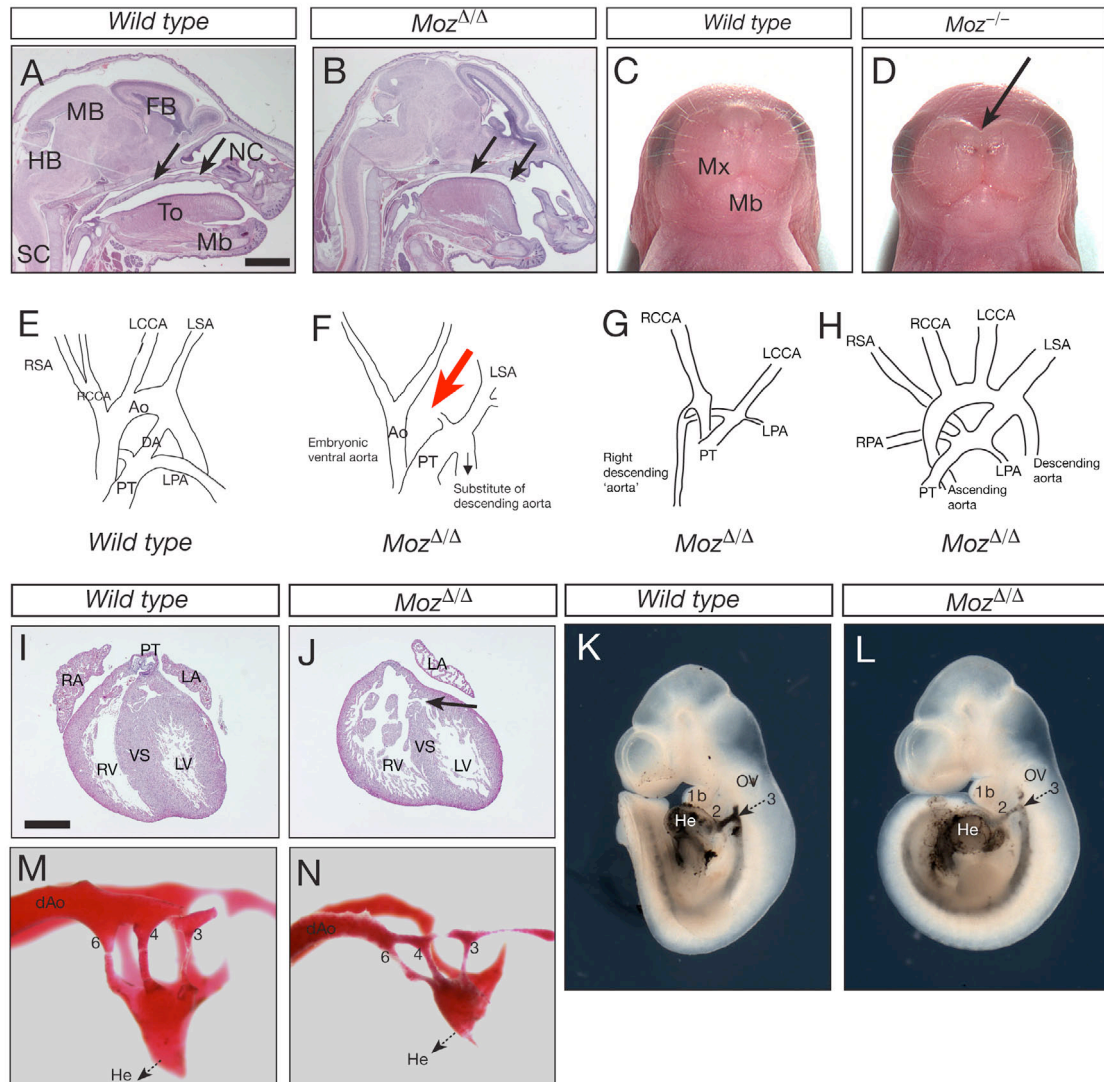

**Figure S1:** Craniofacial, palate, aortic arch and cardiac abnormalities in *Moz* mutant neonates and embryos. E18.5 *Moz*<sup>+/+</sup> (A, C), *Moz*<sup>Δ/Δ</sup> (B) and *Moz*<sup>-/-</sup> (D). (A, B) Sagittal, H&E stained section and (C, D) frontal view of the head. Note the absence of the palate (arrows B vs. A) and incomplete midline fusion of the face (arrow in D vs. C).

(E-H) Schematic drawing of the aortic arch defects in *Moz*<sup>Δ/Δ</sup> mutant pups at E18.5. (E) Wild type vs. (F) the most common abnormality, interrupted aortic arch type B, which occurred in 14 of 19 *Moz*<sup>Δ/Δ</sup> mutant pups examined. Among these, three had an abnormal right descending aorta as depicted in (G). The remaining 5 of 19 pups had less

severe abnormalities with abnormal origin of the RSA, abnormally large diameters and lack of wall structure development in the large blood vessels as seen in (H). None of 28  $Moz^{A/+}$  heterozygous and wild type, littermate control pups exhibited abnormalities of the aortic arch.

(I-N) The cardiovascular defects in  $Moz^{A/A}$  mutant pups. E18.5  $Moz^{+/+}$  (I) and  $Moz^{A/A}$  (J) H&E stained transverse sections of hearts. Compared to Fig. 1N,O, note the milder ventricular septal defect (arrow in J vs. I). (K, L) Overview of ink-injected large vasculature of E9.5  $Moz^{+/+}$  (K) and  $Moz^{A/A}$  (L), which appear similar at E9.5 as opposed to the differences seen at E10.5 (Fig. 1). (M, N) Right lateral view of resin-injected large vasculature of E10.5  $Moz^{+/+}$  (M) and  $Moz^{A/A}$  (N). Note that, in contrast to the absence of the 4th pharyngeal arch artery on the left body side in the  $Moz^{A/A}$  mutants (Fig. 1), the 4th pharyngeal arch artery is present on the right body side  $Moz^{A/A}$  (N), albeit thinner than in the wild type control (M).

1b, mandibular portion of the 1st pharyngeal arch; 2, 2nd pharyngeal arch; 3, 4, 6, 3rd, 4th and 6th pharyngeal arch artery; Ao; aorta; dAo, dorsal aorta; DA, ductus arteriosus; FB, forebrain; He, heart; HB, hindbrain; LA, left atrium; LCCA, left common carotid artery; LSA, left subclavian artery; LPA, left pulmonary artery; LV, left ventricle; Mx, maxilla; Mb, mandible; MB, midbrain; NC, nasal cavity; OV, otic vesicle; PT, pulmonary trunk; RA, right atrium; RCCA, right common carotid artery; RSA, right subclavian artery; RV, right ventricle; SC, spinal cord; To, tongue; VS, ventricular septum. Scale bar equals 1340  $\mu\text{m}$  in (A, B), 2.8 mm in (C, D), 590  $\mu\text{m}$  in (I, J), 1300  $\mu\text{m}$  in (K, L) and 180  $\mu\text{m}$  in (M, N).

Voss\_Fig S2

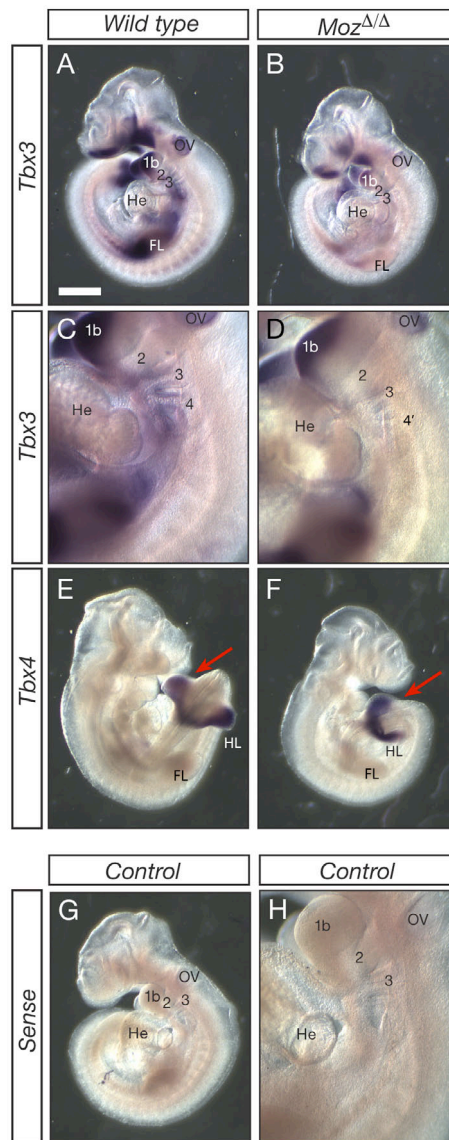

**Figure S2:** Expression of *T-box* genes in *Moz*<sup>Δ/Δ</sup> embryos. E10.5 *Moz*<sup>+/+</sup> (A, C, E) and *Moz*<sup>Δ/Δ</sup> (B, D, F) embryos. Whole-mount *in situ* hybridization for expression of *Tbx3* (A-D), *Tbx4* (E, F), and *sense* control in control embryos (G, H). Note the reduction in *Tbx3* mRNA signal (dark purple; A vs. B, C vs. D). In contrast, *Tbx4* mRNA signal is not reduced in the *Moz*<sup>Δ/Δ</sup> embryos (arrows in E, F). 1b, mandibular aspect of the 1st pharyngeal arch; 2, 3, 4, 2nd, 3rd and 4th pharyngeal arch; 4', region where the 4th pharyngeal arch should be present in the *Moz*<sup>Δ/Δ</sup>; FL, forelimb bud; He, Heart; HL, hindlimb bud; OV, otic vesicle. Scale bar equals 1700 μm in (A, B), 470 μm in (C, D, G), 1860 μm in (E, F), 1480 μm (H).

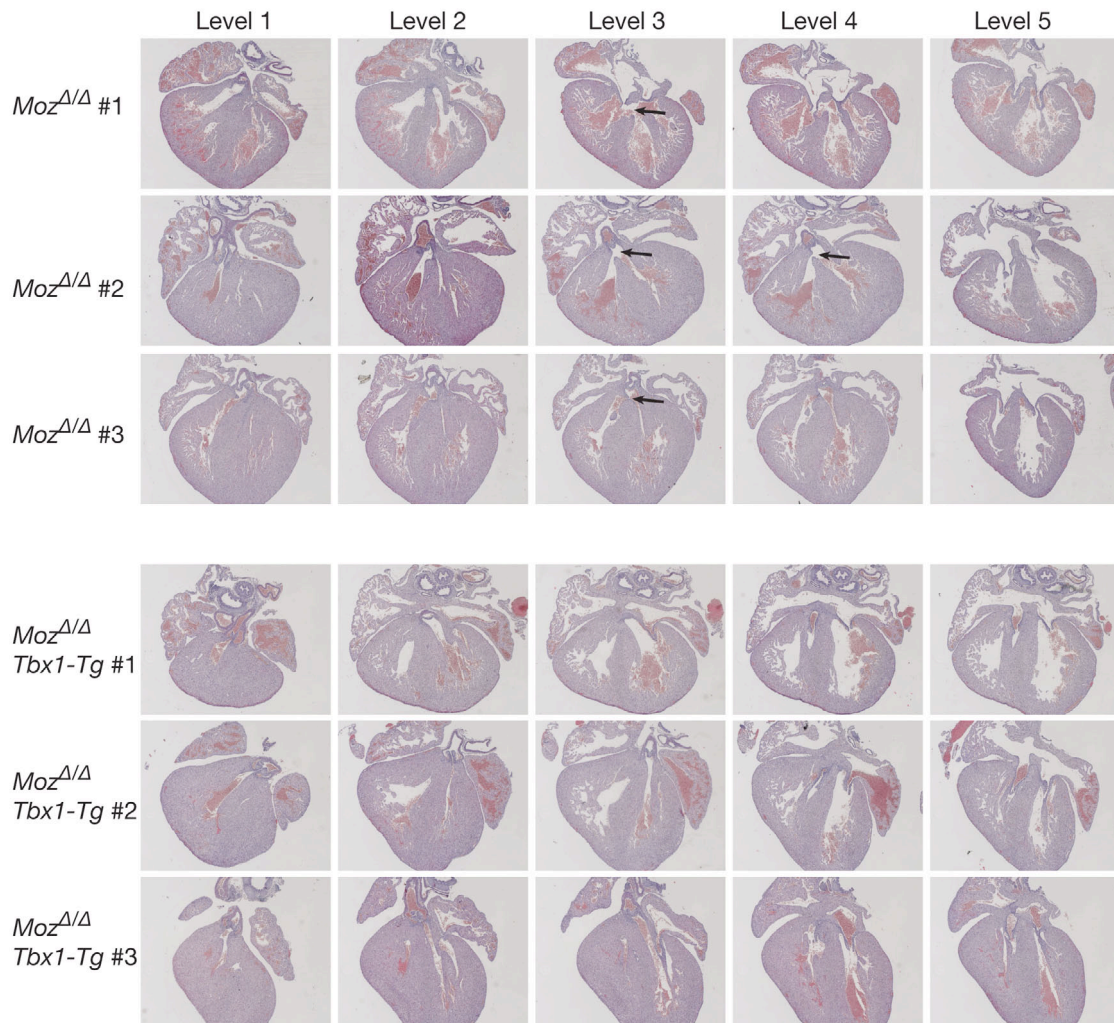

**Figure S3:** Rescue of the *Moz*<sup>Δ/Δ</sup> mutant cardiac septal defect by a *Tbx1* transgene – serial images of *Moz*<sup>Δ/Δ</sup> mutant and *Tbx1* transgenic *Moz*<sup>Δ/Δ</sup> mutant hearts. Images of haematoxylin and eosin stained paraffin serial sections of three E18.5 *Moz*<sup>Δ/Δ</sup> and three *Moz*<sup>Δ/Δ</sup> *Tbx1-Tg* hearts at five ventro-dorsal levels. Note the large, medium and small ventricular septal defects in the *Moz*<sup>Δ/Δ</sup> mutant hearts (arrows) and the absence of ventricular septal defects in the *Moz*<sup>Δ/Δ</sup> *Tbx1-Tg* hearts. The penetrance of ventricular septal defects in the *Moz*<sup>Δ/Δ</sup> mutants is 95% (Table 1).

## Supplemental Experimental Procedures

cDNA templates for cDNA and cRNA probes.

| Gene                           | Provided by       | Ref.                   |
|--------------------------------|-------------------|------------------------|
| <i>Tbx1</i>                    | V. E. Papaiaonnou | (Chapman et al., 1996) |
| <i>Tbx2</i>                    | V. E. Papaiaonnou | (Chapman et al., 1996) |
| <i>Tbx3</i>                    | V. E. Papaiaonnou | (Chapman et al., 1996) |
| <i>Tbx4</i>                    | V. E. Papaiaonnou | (Chapman et al., 1996) |
| <i>Tbx5</i>                    | V. E. Papaiaonnou | (Chapman et al., 1996) |
| <i>Hsp90<math>\beta</math></i> |                   | (Voss et al., 2000)    |

Primers used for RT-qPCR experiments.

| Gene            | GeneBank accession number | Forward              | Reverse                | Corresponding to exons* |
|-----------------|---------------------------|----------------------|------------------------|-------------------------|
| <i>Tbx1</i>     | NM_011532                 | GTGGACCCTCGAAAAGACAG | CCTACCAGAATCACCGGATC   | 4-5                     |
| <i>Tbx2</i>     | NM_009324                 | AGATGGTCATCACCAAGTCC | CGATGTCCATTAGCAGGATG   | 1-2                     |
| <i>Tbx5</i>     | NM_011537                 | ACACATCGTGAAAGCAGACG | TAACTCCAGGTCATCACTGC   | 6-7                     |
| <i>Tbx20</i>    | NM_00120505               | AGCTCTCTCTCGAGCCAAT  | GCACATGATGATTTCTCCACAA | 1-2                     |
| <i>Chd7</i>     | NM_0010814417             | GGAGAACCCTGAGTTTGCTG | ACCACAGGTCCAGTGAGGAG   | Exons 37-38             |
| <i>Foxa2</i>    | NM_010446                 | GAGCCGTGAAGATGGAAGG  | CATGTTGCTCACGGAAGAGTAG | Exons 2-3               |
| <i>Foxc1</i>    | NM_008592                 | GCCAGAGCTCCCTCTACAGC | CTGCAGGTTGCAGTGGAAG    | Exon 1                  |
| <i>Foxc2</i>    | NM_013519                 | CATGCAGGCGGTTACTC    | CCGCCCGGTAGTAGTTTTG    | Exon 1                  |
| <i>Gata4</i>    | NM_008092                 | CTGGAAGACACCCCAATCTC | GTAGTGCCCGTCCCATCTC    | Exons 1-2               |
| <i>Gnb1l</i>    | NM_001081682              | GCTCTGCTGGGAAGGTACTG | GCAATTCCAGGATTGGTGAG   | Exons 7-8               |
| <i>Gp1bb</i>    | NM_001001999              | CGCCTCTCCAGAACGAAGTA | GCTAGCAACAGAAGCAGCAG   | Exon 1                  |
| <i>Nkx2-5</i>   | NM_008700                 | TTGGCGTCGGGGACTTGAAC | AGGCTACGTCAATAAAGTGG   | Exon 4                  |
| <i>Pgk1</i>     | NM_008828                 | TACCTGCTGGCTGGATGG   | CACAGCCTCGGCATATTTCT   | Exons 8-9               |
| <i>Pitx2</i>    | NM_011098                 | GTACCCAGACATGTCCACTC | AAGCCATTCTGCACAGCTC    | Exons 4-5               |
| <i>Rpl13a</i>   | NM_009438                 | GGAGAAACGGAAGGAAAAGG | TGAGGACCTCTGTGAACTTGC  | Exons 7-8               |
| <i>Hsp90ab1</i> | NM_008302                 | AGAATCCGACACCAAAGTGC | ACCTGGAACCATGCTAAG     | Exon 10                 |

\*PCR primers were intron flanking where possible.

### Primers used for qPCR in ChIP experiments

| Gene                 | Tile                             | Forward                | Reverse                | Size [bp] | Starts at bp from of exon 1 |
|----------------------|----------------------------------|------------------------|------------------------|-----------|-----------------------------|
| <i>Tbx1</i>          | _1                               | GTCCGCGTCTATACTGTCAGG  | TTTCTTCCTGTCCCAGAGTCC  | 128       | -1005                       |
| <i>Tbx1</i>          | _2                               | TTTACGATTGAAAGGGCAAAG  | TTTCTCGGTGTCACCTCTCTCC | 114       | -490                        |
| <i>Tbx1</i>          | _cfs                             | ATGCTTTCCATAGCTCCTCCTG | GCTTGTCGAAAGACACAATCTG | 132       | exon 3                      |
| <i>Tbx2</i>          | _1                               | GGAAGAGATAGATGGGCTTGC  | GTGAGCGCACCTTCTACAGAG  | 130       | -807                        |
| <i>Tbx2</i>          | _2                               | TTTTCTTACTGCTGAGGCTTCC | CCTTGATTGCTGATTTTACGC  | 132       | +9                          |
| <i>Tbx5</i>          | _1                               | GCAGACTTCAGAGAGGCTAAGG | CTCCTCAAGACACACACTGGAG | 132       | -769                        |
| <i>Tbx5</i>          | _2                               | TCTTTCCTTCCTTCCTTCCTC  | TTCCACTTCCCATCCTCTTTAC | 135       | -282                        |
| <i>Tbx1</i>          | <i>Forkhead response element</i> | TCAGCACAGCCAGCCGCTTT   | ATTTCTTTGGCCCCGCCCC    | 111       | - 14728*                    |
| <i>Foxc1</i>         | TSS                              | ATTGGCTGCCGCCTCCGTAGT  | GAGCATCCGTCACCCAGGCGAG |           |                             |
| <i>Foxc2</i>         | TSS                              | GGGCGCGGCCTGAAGAAAGTA  | GCGGCCGAGCCCGGAAAAA    | 104       | - 49                        |
| <i>Pitx2</i>         | TSS                              | CCGCCGAGAGTGACGTCTTG   | CCCCAGCGAGAGACCGGCA    | 106       | - 52                        |
| <i>B2m</i>           | 5' of TSS                        | TGAACGACCAGATACACCAAAC | AAAGGGACTTTCCCATTTTCAG | 128       | - 241                       |
| <i>Albumin</i>       | TSS                              | GGGGTAGGAACCAATGAAATG  | ATTTTGCCAGAGGCTAGTGG   | 132       | -97                         |
| <i>Hemoglobin b1</i> | TSS                              | GTAAGGCCAATCTGCTCAC    | TGTCTGTTTCTGGGGTTGTG   | 133       | -84                         |

\*qPCR product encompasses FOXA2/FOXC1/FOXC2 response element as published (Yamagishi et al., 2003).

### Supplemental References

Chapman, D.L., Garvey, N., Hancock, S., Alexiou, M., Agulnik, S.I., Gibson-Brown, J.J., Cebra-Thomas, J., Bollag, R.J., Silver, L.M., and Papaioannou, V.E. (1996). Expression of the T-box family genes, *Tbx1-Tbx5*, during early mouse development. *Dev Dyn* 206, 379-390.

Voss, A.K., Thomas, T., and Gruss, P. (2000). Mice lacking HSP90beta fail to develop a placental labyrinth. *Development* 127, 1-11.

Yamagishi, H., Maeda, J., Hu, T., McAnally, J., Conway, S.J., Kume, T., Meyers, E.N., Yamagishi, C., and Srivastava, D. (2003). *Tbx1* is regulated by tissue-specific forkhead proteins through a common Sonic hedgehog-responsive enhancer. *Genes Dev* 17, 269-281.
